RESEARCH ARTICLE

# Effects of manipulating the duration and intensity of aerobic training sessions on the physical performance of rats

Francisco Teixeira-Coelho<sup>1,2</sup>, Cletiana Gonçalves Fonseca<sup>1</sup>, Nicolas Henrique Santos Barbosa<sup>1</sup>, Filipe Ferreira Vaz<sup>1</sup>, Letícia Maria de Souza Cordeiro<sup>1</sup>, Cândido Celso Coimbra<sup>3</sup>, Washington Pires<sup>1,4</sup>, Danusa Dias Soares<sup>1</sup>, Samuel Penna Wanner<sup>1\*</sup>

**1** Exercise Physiology Laboratory, School of Physical Education, Physiotherapy and Occupational Therapy, Universidade Federal de Minas Gerais, Belo Horizonte (MG), Brazil, **2** Teacher Formation Center; Universidade Federal do Recôncavo da Bahia, Amargosa (BA), Brazil, **3** Laboratory of Endocrinology and Metabolism, Institute of Biological Sciences, Universidade Federal de Minas Gerais, Belo Horizonte (MG), Brazil, **4** Department of Physical Education, Institute of Life Sciences, Universidade Federal de Juiz de Fora, Governador Valadares (MG), Brazil

\* [samuelwanner@ufmg.br](mailto:samuelwanner@ufmg.br)

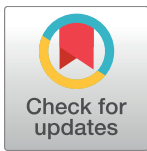

**OPEN ACCESS**

**Citation:** Teixeira-Coelho F, Fonseca CG, Barbosa NHS, Vaz FF, Cordeiro LMdS, Coimbra CC, et al. (2017) Effects of manipulating the duration and intensity of aerobic training sessions on the physical performance of rats. PLoS ONE 12(8): e0183763. <https://doi.org/10.1371/journal.pone.0183763>

**Editor:** Alejandro Lucía, Universidad Europea de Madrid, SPAIN

**Received:** February 7, 2017

**Accepted:** August 10, 2017

**Published:** August 25, 2017

**Copyright:** © 2017 Teixeira-Coelho et al. This is an open access article distributed under the terms of the [Creative Commons Attribution License](https://creativecommons.org/licenses/by/4.0/), which permits unrestricted use, distribution, and reproduction in any medium, provided the original author and source are credited.

**Data Availability Statement:** All relevant data are within the paper and its Supporting Information files.

**Funding:** This study was funded by the following agencies: Conselho Nacional de Desenvolvimento Científico e Tecnológico (CNPq; grant number 473737/2013-2) and Fundação de Amparo à Pesquisa do Estado de Minas Gerais (FAPEMIG; grant number APQ-01946-14). LMdS was a recipient of a post-doc fellowship from FAPEMIG

## Abstract

This study investigated the effects of manipulating the load components of aerobic training sessions on the physical performance of rats. To achieve this purpose, adult male Wistar rats were divided into four groups: an untrained control (CON) group and training groups with a predominant overload in intensity (INT) or duration (DUR) or alternating and similar overloads in intensity and duration (ID). Prior to, during, and after 8 weeks of the control or training protocols, the performance of the rats (evaluated by their workload) was determined during fatiguing, incremental-speed treadmill running. Two additional incremental running tests were performed prior to and at the end of the protocols to measure the peak rate of oxygen consumption ( $VO_{2peak}$ ). As expected, the rats in the trained groups exhibited increased performance, whereas the untrained rats showed stable performance throughout the 8 weeks. Notably, the performance gain exhibited by the DUR rats reached a plateau after the 4<sup>th</sup> week. This plateau was not present in the INT or ID rats, which exhibited increased performance at the end of training protocol compared with the DUR rats. None of the training protocols changed the  $VO_{2peak}$  values; however, these values were attained at faster speeds, which indicated increased running economy. In conclusion, our findings demonstrate that the training protocols improved the physical performance of rats, likely resulting from enhanced running economy. Furthermore, compared with overload in duration, overload in the intensity of training sessions was more effective at inducing performance improvements across the 8 weeks of the study.

## Introduction

Training is a complex process of overload induction to disturb body homeostasis and produce acute fatigue, which leads to physical performance improvement if the training sessions are

(grant number BPD 00555-14). CGF was recipient of a PhD fellowship from Coordenação de Aperfeiçoamento de Pessoal de Nível Superior (CAPES), whereas NHSB was a recipient of an undergraduate fellowship from FAPEMIG. The funders had no role in study design, data collection and analysis, decision to publish, or preparation of the manuscript.

**Competing interests:** The authors have declared that no competing interests exist.

repeatedly performed with appropriate recovery periods [1]. Thus, fatigue and the resulting adaptations induced by exercise sessions depend on the applied training loads. In general, these loads are characterized by the intensity, duration and frequency of exercise sessions [2], with the combination of the latter two factors determining the training volume (i.e., in the case of endurance training, training volume can be expressed as the distance traveled per week or month). It is widely accepted that the optimization of these load components produces adaptive responses that increase physical performance [2].

Distinct manipulation of the load components (e.g., intensity and volume) differentially modulates molecular signaling in skeletal muscle [3] and thus may differentially affect physical performance. However, there is no consensus on how training programs should be structured (the ideal moment for applying overload in these load components or which load component should be predominantly manipulated) to optimize performance gains [3]. In particular, the efficacy of low-intensity long-duration training sessions and the efficacy of increasing training volumes in improving performance remain controversial [4–6].

A seminal study by Helgerud et al. [7] compared different training protocols and observed that performing high-intensity interval training was significantly more effective than performing the same total work at or below the lactate threshold for improving the maximum rate of oxygen consumption ( $VO_{2max}$ ) in healthy university students. Similarly, a recent meta-analysis [8] indicated that high-intensity interval training provides greater  $VO_{2max}$  gains than moderate-intensity continuous training in individuals with cardiometabolic diseases. Based on these data, we hypothesized that a predominant overload in the intensity of aerobic training sessions would produce more pronounced adaptations than a predominant overload in the duration, thereby resulting in increased  $VO_{2max}$  and physical performance improvement. Therefore, our first aim was to investigate the effects of manipulating the intensity and duration of aerobic training sessions on the  $VO_{2max}$  and physical performance of rats subjected to incremental exercise.

$VO_{2max}$  as well as other physiological parameters, such as running economy, are important for determining endurance running performance [9, 10]. In highly trained and experienced distance runners with a similar  $VO_{2max}$ , running economy accounts for a large amount of the variation observed in performance in a 10 km race [11]. Regarding the changes in running economy induced by different training protocols, Franch et al. [12] observed that recreational runners had improved economy and performance with exhaustive distance training or long-interval running, whereas short-interval running was less efficient. Considering these findings, we hypothesized that predominant overload on duration would produce greater improvements in running economy. Thus, we also investigated the effects of manipulating the intensity and duration of aerobic training sessions on the running economy of rats.

To adequately investigate the effectiveness of protocols with predominant overload in intensity or duration on performance improvement, we selected untrained rats that began training with the same load and were subjected to the same overload in their training volume. The present experiments were conducted with laboratory rodents, which enabled the standardization of age, physical exercise experience and intrinsic endurance at training initiation as well as their level of physical activity and diet outside the training environment. Unlike other studies, we did not simply compare protocols with different intensities using rats that had already begun training at different loads [13] or compare high-volume against high-intensity protocols [14]; the present study focused on the divergent effects of distinct overload progressions applied to rats that began training with a similar load. Therefore, we equalized the number of weekly sessions, the distance covered in each session and, consequently, the training volumes among the trained groups, and then overload was predominantly applied to the intensity or duration of the exercise sessions. In addition, these protocols (i.e., predominant overload in intensity or

duration) were also compared with a traditional protocol, in which the overload was applied by alternately increasing the intensity and duration of the training sessions.

Additionally, heterogenic lineages of laboratory rats show large variability in their intrinsic endurance capacities, which are associated with differences in their cardiac functioning [15] and central nervous system [16]. Because previous studies in humans have shown that initial fitness levels determine the magnitude of physiological adaptations to training [2], we hypothesized that rats with lower intrinsic endurance would present greater performance gains. Moreover, the degree and rate at which physiological systems and intense exercise performance change in the short term, at least in well-conditioned subjects, appear to be affected more by high-intensity training than by high-volume training [17]. Thus, it is likely that rats with higher intrinsic endurance (i.e., those with lower adaptive potential in response to training) would need more intense stimuli than rats with lower intrinsic endurance. We therefore expected that a predominant overload in intensity would be required to maximize the ergogenic effects induced by training in rats with higher intrinsic aerobic capacity. Therefore, the effects of the three aerobic trainings on performance in rats with different intrinsic aerobic capacities were also evaluated.

## Materials and methods

### Animals

All experimental procedures were approved by the Ethics Commission of the Universidade Federal de Minas Gerais for the Care and Use of Laboratory Animals (protocol 64/2014) and were conducted in accordance with the regulations provided by the Brazilian National Council for the Control of Animal Experimentation. Adult male Wistar rats weighing 220–250 g were housed in collective cages under controlled temperature ( $24 \pm 1^\circ\text{C}$ ) and light conditions (lights on from 0500 until 1900 h) with water and rat chow provided *ad libitum*.

### Familiarization with running on a treadmill

The rats were initially familiarized with running on a treadmill designed for small animals (Gaustec Magnetismo; Nova Lima, MG, Brazil) during 5 consecutive days; the duration and speed of each familiarization session are described in Table 1. This 5-day protocol was used to teach the rats the direction to run, i.e., away from the electrical stimulus grid placed at the end of the treadmill belt. Following the familiarization sessions, all rats exhibited a steady running pattern, with minimal exposure to electrical stimuli (0.5 mA).

The familiarization sessions were performed with a treadmill inclination of  $5^\circ$  and in a room with controlled temperature conditions ( $23 \pm 1^\circ\text{C}$ ), which were similar across all training and incremental exercise sessions.

### Training protocols

The 84 rats were allocated to four groups (n = 21 each): an untrained control (CON) group, a training group with predominant overload in intensity (INT), a training group with

**Table 1. Five-day familiarization protocol with running on a treadmill.**

| 1 <sup>st</sup> day | 2 <sup>nd</sup> day | 3 <sup>rd</sup> , 4 <sup>th</sup> and 5 <sup>th</sup> days |
|---------------------|---------------------|------------------------------------------------------------|
| 5 min (rest)        | 5 min (rest)        | 5 min (rest)                                               |
| 1 min (10 m/min)    | 1 min (12 m/min)    | 5 min (15 m/min)                                           |
| 1 min (12 m/min)    | 5 min (15 m/min)    |                                                            |
| 5 min (15 m/min)    |                     |                                                            |

<https://doi.org/10.1371/journal.pone.0183763.t001>

predominant overload in duration (DUR) and a training group with alternating and similar overloads in intensity and duration (ID). A homogeneous distribution of rats among the experimental groups was guaranteed by matching the mean values and coefficient of variations of the intrinsic aerobic capacity, which were evaluated by the workload performed during the first test.

The training protocols consisted of running sessions on a treadmill across 8 weeks, with 5 weekly sessions always performed at the same time of day. The three protocols used in this study are described in detail in the Supporting Information section of the manuscript (S1–S3 Tables) and were adapted from a protocol proposed by Santiago et al. [18]. At the last session of the aerobic training protocols, the increase in speed relative to the first session corresponded to 225% (INT), 125% (ID) and 38.5% (DUR; Fig 1A), whereas the increase in duration corresponded to 38.5%, 100% and 225% in the INT, ID and DUR groups, respectively (Fig 1B). Despite the different overload protocols, the total distance covered by the rats during each training session was the same among the three trained groups. To ensure similar handling and exposure to the treadmill setup, the CON rats were subjected to 2 min of treadmill running 5 days per week, with the same running speed as the ID rats.

The rats that lost their ability to exhibit a steady run on the Gaustec treadmill and were subsequently exposed to frequent, light electrical stimuli as aerobic training progressed were transferred to run on another treadmill setup (Panlab/Harvard Apparatus). This strategy was successful because it avoided excluding rats from the training protocol without interfering with performance gains.

### Incremental-speed treadmill running for assessing the workload performed by the rats

All 84 rats were subjected to incremental-speed exercises to assess the time to fatigue and workload before (first test) and at the ends of the 4<sup>th</sup> (second test) and 8<sup>th</sup> weeks (third test). All these incremental-speed exercises were performed at least 24 h after the last familiarization session (first test) and the last training session for the week (second and third tests). During the incremental exercises, the rats began running at a speed of 10 m.min<sup>-1</sup>, followed by speed increments of 1 m.min<sup>-1</sup> every 3 min until they were fatigued [15]. Volitional fatigue was defined as the point at which the animals were no longer able to maintain their pace with the treadmill, even when exposed to light electrical stimulation for 10 s [19, 20].

### Incremental-speed treadmill running for assessing the peak rate of oxygen consumption ( $VO_{2peak}$ ) and running economy

Thirty-three of the 84 rats (8 rats in each training group and 9 rats in the control group) were subjected to additional incremental exercises on the Panlab treadmill running setup (Panlab/Harvard Apparatus, Cornella, Spain) before and after the training protocol (first and second  $VO_2$  testing, respectively). The aim of these two incremental exercises was to assess running economy and the  $VO_{2max}$  attained by the rats.

This subgroup of 33 rats was therefore subjected to five incremental exercises: two before, one during and two after the control or training protocols. Whenever two exercises were performed in sequence (i.e., before and after), the first was performed on the Gaustec treadmill to assess workload (at least 24 h after the last familiarization session or the last training session for the eight week), whereas the second was performed on the Panlab treadmill to assess  $VO_{2max}$ , running economy and workload (48 h following the first exercise). Despite the fact that two different setups were used, the workload performed by the same rat during exercise in the two treadmills was significantly correlated either before or after training ( $p < 0.001$  for both, Pearson's correlation).

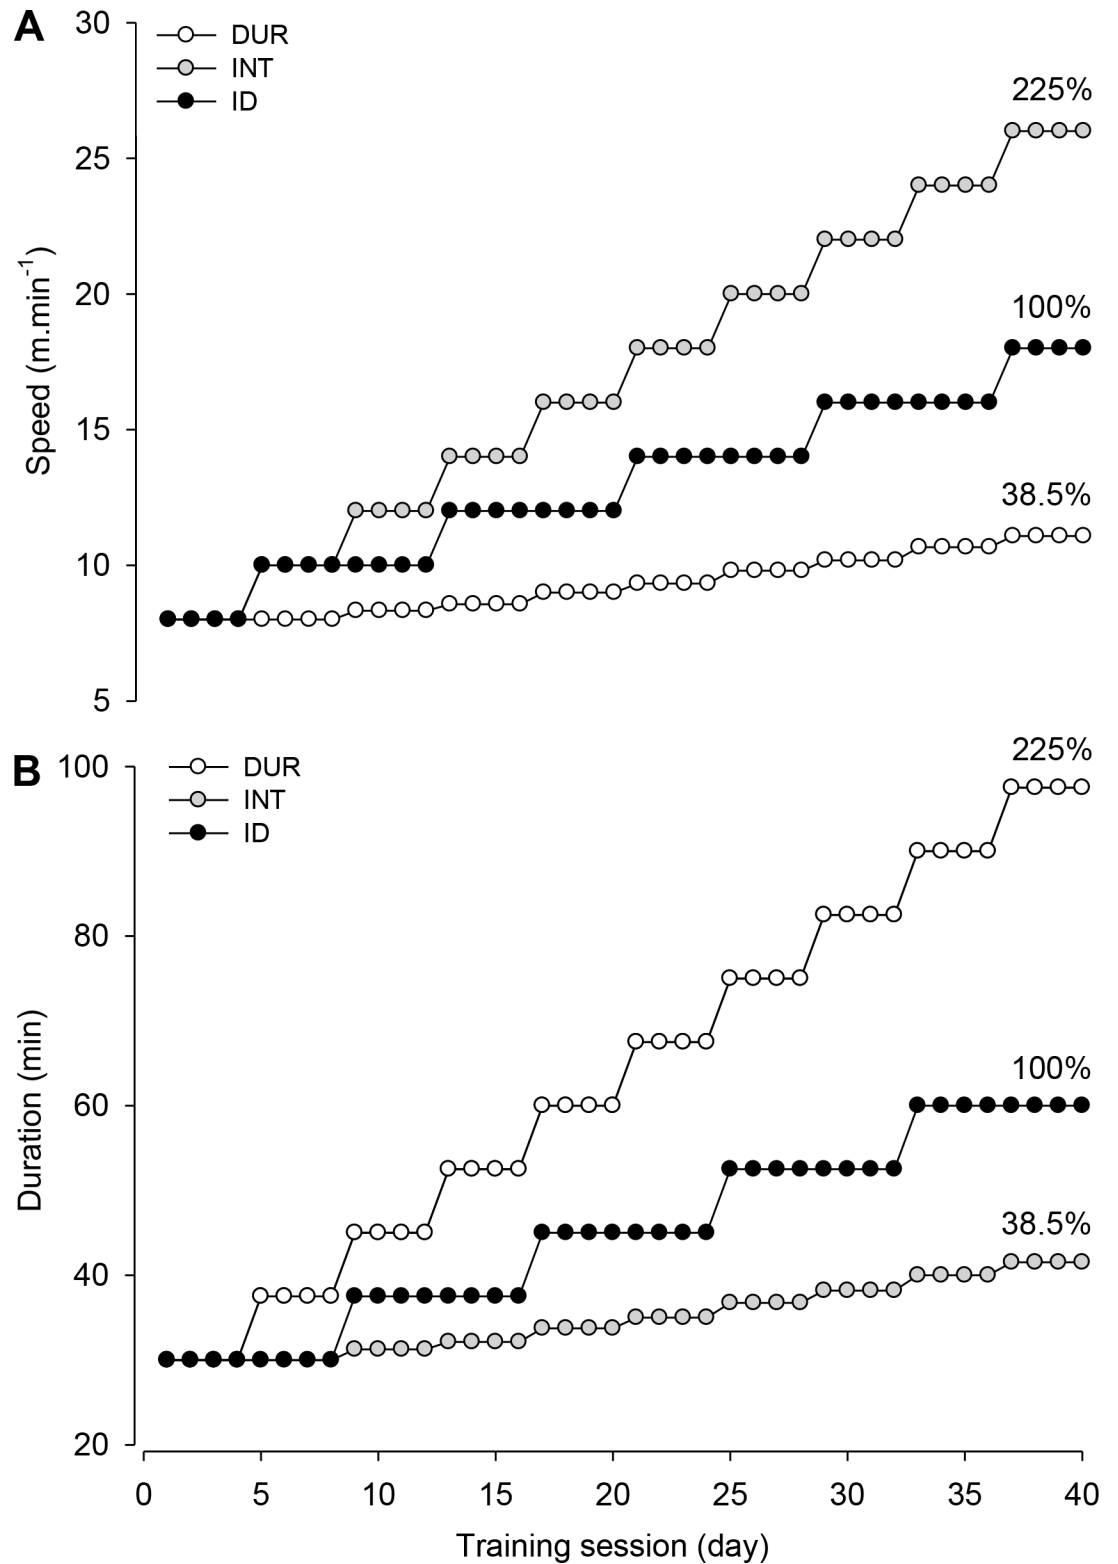

**Fig 1. Overload during the training protocols.** Description of the increases in treadmill speed (intensity; panel A) and running time (duration; panel B) during the 40 training sessions in each of the three trained groups. Each circle represents one training session.

<https://doi.org/10.1371/journal.pone.0183763.g001>

## Euthanasia

After the last experimental trial, the rats were euthanized through an intraperitoneal injection of a lethal dose of anesthetic (ketamine 240 mg/kg and xylazine 30.5 mg/kg).

## Measurements

The rats were weighed daily; changes in body mass were used as an index of health and hydration status during the training protocols. The time to fatigue (in min) corresponded to the time elapsed between the start and end of the fatiguing incremental exercises. The  $\text{VO}_2$ , expressed in size-adjusted units ( $\text{mL}\cdot\text{kg}^{-0.75}\cdot\text{min}^{-1}$ ), was continuously measured via open-flow indirect calorimetry (Panlab/Harvard Apparatus). The  $\text{VO}_2$  data were transferred to a computerized system (Metabolism, Panlab/Harvard Apparatus), which was calibrated weekly using a known mixture of gases to ensure the reliability of the evaluated data. In most of the rats evaluated, we could not observe a clear  $\text{VO}_2$  plateau with increased treadmill speed. Thus, the  $\text{VO}_{2\text{peak}}$  was determined instead of the  $\text{VO}_{2\text{max}}$ . The  $\text{VO}_{2\text{peak}}$  consisted of the highest  $\text{VO}_2$  value measured, usually at fatigue. Because the rats' body mass increased by ~67% across the 8 weeks, the  $\text{VO}_2$  data were expressed in relation to body mass raised to the power of 0.75 [21].

The temperature inside the treadmill chamber was measured every min during the incremental exercises (except for the experiments with  $\text{VO}_2$  measurements) via a thermocouple attached with impermeable adhesive tape to the ceiling of the acrylic chamber containing the treadmill belt.

## Calculations

The maximum speed ( $S_{\text{max}}$ ;  $\text{m}\cdot\text{min}^{-1}$ ) attained was calculated according to the following equation:  $S_{\text{max}} = S + (t/180)$ , where  $S$  = speed in the last completed stage in  $\text{m}\cdot\text{min}^{-1}$ , and  $t$  = time spent in the incomplete stage in seconds [22]. The workload (J) was calculated as follows:  $\text{workload} = m\cdot g\cdot s\cdot \sin\theta\cdot t$ , where  $m$  = body mass in kg,  $g$  = gravity force ( $9.8\text{ m}\cdot\text{s}^{-2}$ ),  $s$  = speed in  $\text{m}\cdot\text{min}^{-1}$ ,  $\theta$  = inclination of the treadmill ( $5^\circ$ ), and  $t$  = time spent in each stage in min [23]. Workload values were calculated for each stage of the incremental exercise, including the incomplete stage and were then summed; the value obtained after the summation corresponded to the exercise workload.

Two intensity indices of the training sessions were calculated: the percentages of  $S_{\text{max}}$  (%  $S_{\text{max}}$ ) and  $\text{VO}_{2\text{peak}}$  (%  $\text{VO}_{2\text{peak}}$ ). The %  $S_{\text{max}}$  was calculated by dividing the treadmill speed in the beginning (first session), middle (21<sup>st</sup> session) and end (40<sup>th</sup> session) of the training protocol by the  $S_{\text{max}}$  attained during the first, second and third tests, respectively; this value was then multiplied by 100. To estimate the %  $\text{VO}_{2\text{peak}}$  associated with physical exertion during the last training session, we verified the existence of a linear correlation between  $\text{VO}_2$  and treadmill speed during the incremental exercise for each rat evaluated; the data regarding  $\text{VO}_2$  and speed at each stage of the exercise were included in this analysis. Because these correlations were significant ( $p$  was always less than 0.05 following Pearson's correlation), the equation expressing the linear regression between the two parameters was calculated for each rat, and the %  $\text{VO}_{2\text{peak}}$  corresponding to a given treadmill run was then estimated.

Gross oxygen cost of running, which is inversely associated with running economy, was calculated by dividing the  $\text{VO}_2$  ( $\text{mL}\cdot\text{kg}^{-0.75}\cdot\text{min}^{-1}$ ) by the running speed ( $\text{m}\cdot\text{min}^{-1}$ ), and the resulting value was expressed in  $\text{mL}\cdot\text{kg}^{-0.75}\cdot\text{m}^{-1}$  [24]. Although the gross oxygen cost of running is commonly determined during constant-speed exercises, we calculated this parameter in the last min of the last 3-min stage that was completed during the incremental exercise, since Wisloff et al. [25] reported that  $\text{VO}_2$  leveled off in running rats ~3 min after the stage was changed.

## Statistical analysis

Shapiro-Wilk and Levene's tests were used to assess the normality and homoscedasticity of the data, respectively. Because all data presented a normal distribution, they were expressed as the means  $\pm$  SEM. The body mass, workload,  $VO_{2peak}$ , running economy and  $\%S_{max}$  were compared between groups and moments (before, during, and after the 8-week period) using two-way analyses of variance (ANOVAs), with repeated measures applied only for the moment factor. The  $VO_2$  curves were compared between the running speeds and moments using a two-way ANOVA, with repeated measures applied for both factors. The changes in the workload performed or the  $VO_{2peak}$  attained between the first and third tests were compared between the experimental groups and the intrinsic aerobic capacity via a two-way ANOVA. The intensity of the last training session, expressed as the  $\%VO_{2peak}$ , was compared between the groups using a one-way ANOVA. When applicable, these ANOVAs were followed by Tukey's *post hoc* tests to identify differences between pairs of means. The association between workload and  $VO_{2peak}$  during incremental exercises was assessed using Pearson's correlation coefficient. The significance level was set at  $\alpha < 0.05$ .

## Results

The application of the overload principle was evident in the three training protocols; both the duration and intensity (running speed) of the training sessions were successfully increased across the 8-week period (Fig 1A and 1B). Regarding the duration of the training sessions, the DUR group ran for 97.5 min during the last session, which corresponded to a 225% increase relative to the duration of the first session. As expected, intergroup differences were also identified; for example, the rats in the DUR group exhibited 487% and 125% higher increases in duration across the 8 weeks than those exhibited by the rats in the INT and ID groups, respectively.

Regarding the intensity of the training sessions, the three trained groups initiated the protocol running at a similar  $\%S_{max}$  (DUR:  $32.4 \pm 1.2\%$  vs. INT:  $31.6 \pm 1.0\%$  vs. ID:  $30.5 \pm 0.9\%$ ; Fig 2A). However, both the INT and ID groups ran at a higher  $\%S_{max}$  relative to the DUR group in the middle and at the end of the training (Fig 2A). Indeed, the DUR rats showed only a slightly higher  $\%S_{max}$  at the end than at the beginning of the training ( $41.0 \pm 1.3\%$  vs.  $32.4 \pm 1.2\%$ ). In addition, in the middle and at the end of the training period, the INT group ran at a higher  $\%S_{max}$  relative to the ID group (middle:  $65.9 \pm 1.9\%$  vs.  $51.4 \pm 1.7\%$ , and end:  $86.8 \pm 2.2\%$  vs.  $59.8 \pm 1.7\%$ ). Similarly, the different running speeds between the trained groups also represented a different estimated  $\%VO_{2peak}$  in the last training session (Fig 2B). The INT rats ran at increased intensities ( $89 \pm 3\% VO_{2peak}$ ) compared with the rats in the other groups, and the ID rats ran at increased intensities compared with the DUR rats ( $75 \pm 3\%$  vs.  $58 \pm 4\% VO_{2peak}$ ).

During the 8-week period, the rats in all the experimental groups exhibited progressive increases in body mass, with a final average body mass of approximately 400 g for all groups. Notably, aerobic training and the training load components, i.e., intensity and duration, did not influence body mass gain (Fig 3).

We subsequently assessed the rats' performance by calculating their workload, a performance index that considers body mass (Fig 4). The CON group performed a similar workload in the three tests during the training protocol (first =  $203.1 \pm 15.5$  J; second =  $216.1 \pm 15.3$  J; and third =  $206.8 \pm 15.6$  J). All trained groups exhibited an increased workload in the second test compared with those in the first test (DUR:  $329.3 \pm 28.8$  vs.  $196.3 \pm 15.5$  J, respectively; INT:  $322.2 \pm 18.6$  vs.  $202.3 \pm 14.4$  J, respectively; and ID:  $334.8 \pm 26.6$  vs.  $218.1 \pm 12.2$  J, respectively). The trained groups also exhibited an increased workload compared with the CON group in the second (CON =  $216.1 \pm 15.3$  J vs. DUR =  $329.3 \pm 28.8$  J vs. INT =  $322.2 \pm 18.6$  J vs. ID =  $334.8 \pm 26.6$  J) and third tests (CON =  $206.8 \pm 15.6$  J vs. DUR =  $344.3 \pm 23.3$  J vs.

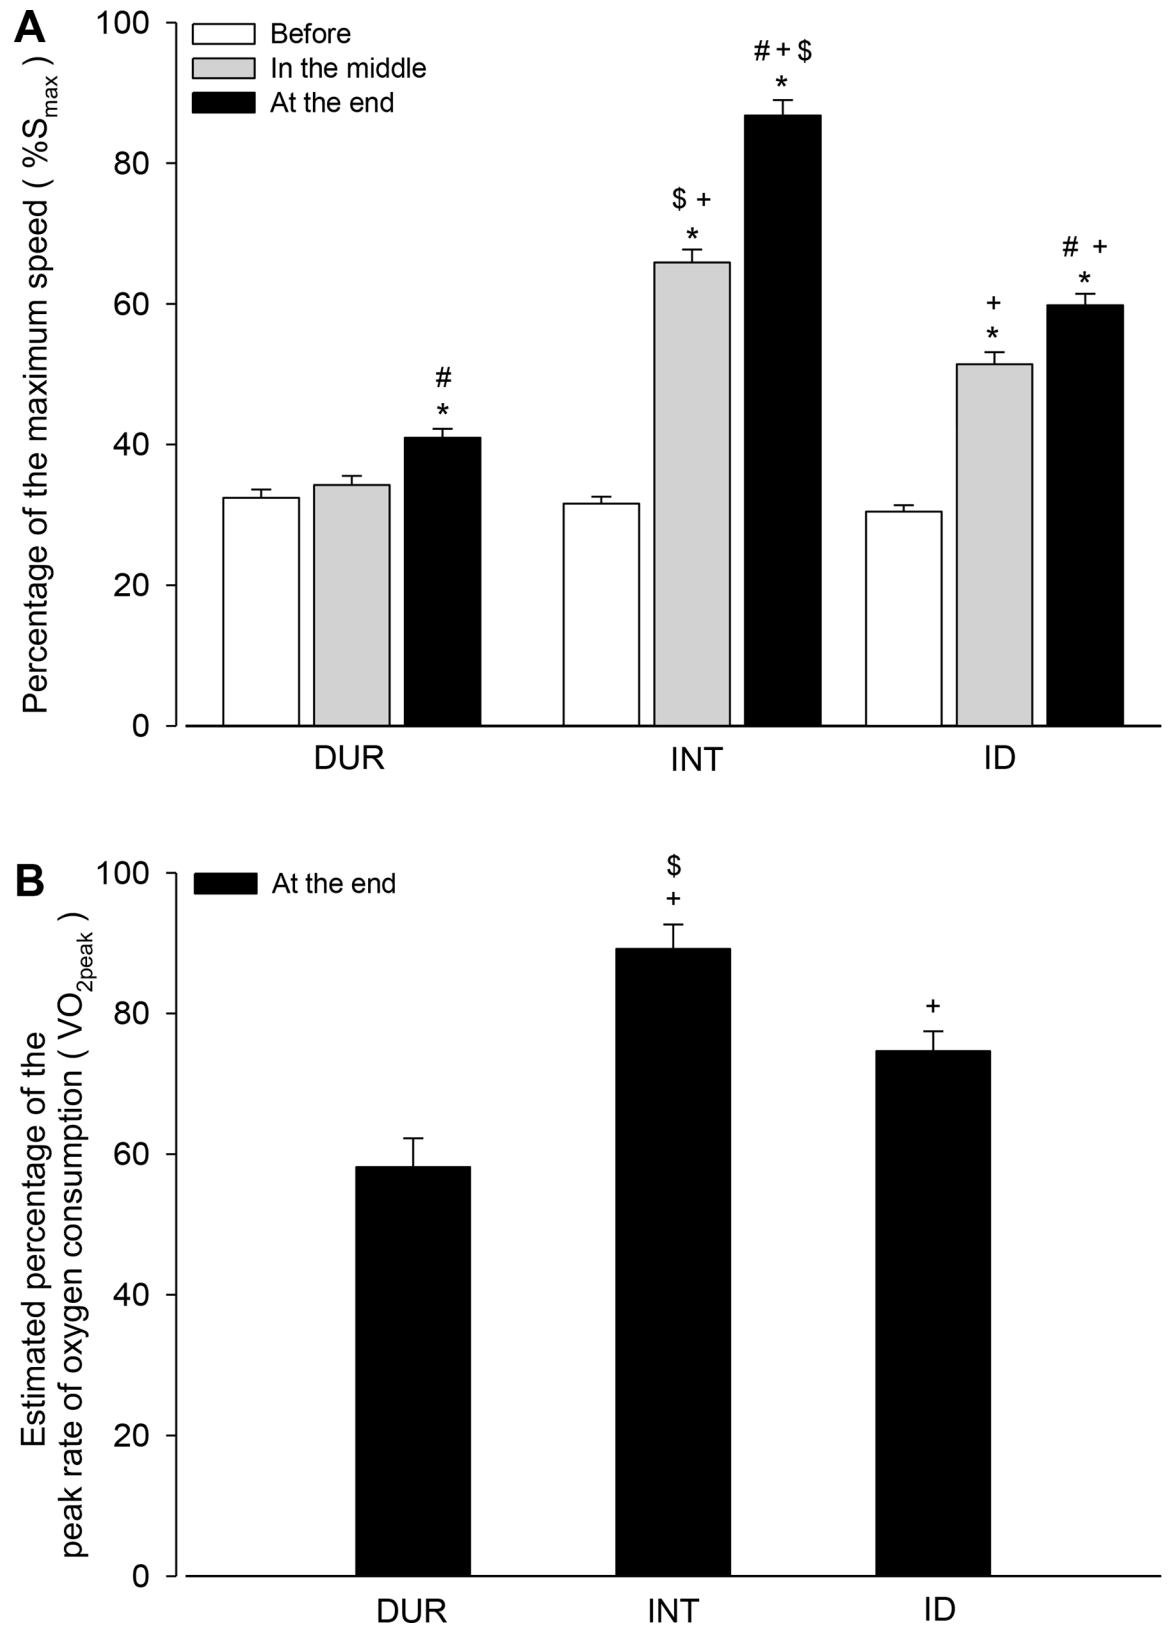

**Fig 2. Intensity of the exercise sessions during the three training protocols.** Panel A indicates the percentage of the maximum speed at which the rats were running at three different moments: before, in the middle of (beginning of the fifth week) and at the end of the training protocol. Two-way ANOVA yielded the following results: group effect ( $F = 133.556$ ,  $p < 0.001$ ), moment effect ( $F = 463.267$ ,  $p < 0.001$ ) and interaction between the two factors ( $F = 91.745$ ,  $p < 0.001$ ;  $n = 21$  rats)



per training group). Panel B indicates the estimated percentage of the peak rate of oxygen consumption at which the rats were running during the last session of the training protocol. One-way ANOVA yielded the following result: group effect ( $F = 19.798$ ,  $p < 0.001$ ;  $n = 8$  rats per training group). \* Significantly different relative to the beginning of training within an experimental group ( $p < 0.001$ ). # Significantly different relative to the middle of training within an experimental group ( $p < 0.001$ ). + Significantly different relative to the DUR group in the same test ( $p < 0.001$ ). \$ Significantly different relative to the ID group in the same test ( $p < 0.001$ ).

<https://doi.org/10.1371/journal.pone.0183763.g002>

INT =  $463.6 \pm 18.8$  J vs. ID =  $441.5 \pm 22.7$  J). In addition, the INT and ID groups but not the DUR group performed higher workloads in the third test than in the second test (INT:  $436.6 \pm 18.8$  vs.  $322.2 \pm 18.6$  J, respectively; ID:  $441.5 \pm 22.8$  vs.  $334.8 \pm 26.6$  J, respectively). Therefore, the workload performed by the INT and ID rats in the third test was increased compared with the performance by the DUR rats (Fig 4).

We then assessed the rats'  $VO_{2\text{peak}}$  adjusted to their size, which was measured before and after the 8-week protocol. Before the control or training protocols,  $VO_{2\text{peak}}$  values were positively correlated with workload performed by the rats ( $r = 0.691$ ;  $p < 0.001$ ). Unexpectedly, no training effects and no intergroup differences were identified in this physiological parameter (Fig 5). Following the 8-week period,  $VO_{2\text{peak}}$  values were still positively correlated with workload ( $r = 0.424$ ;  $p < 0.05$ ), but the Pearson's correlation coefficient was lower than that observed at the beginning of the experiment. Although no differences were identified in  $VO_{2\text{peak}}$ , the  $VO_2$  at submaximal intensities of incremental exercise was lower in the INT and ID groups after aerobic training than prior to aerobic training (Fig 6C and 6D). This response was not evidenced in the CON (Fig 6A) or DUR (Fig 6B) groups.

The finding that all trained groups reached similar  $VO_{2\text{peak}}$  values at higher speeds after the training protocols suggested a training-induced reduction in the gross oxygen cost of running, which corresponds to an improvement in running economy. Indeed, the running economy of the trained rats at the last completed stage was increased after the training protocols compared with that prior to the training protocols, whereas the CON rats tended to display reduced economy ( $p = 0.051$ ). Furthermore, all trained groups exhibited increased running economy compared with the CON group at the end of the 8 weeks (Fig 7).

The final analyses consisted of subdividing the rats from each group into groups with lower and higher intrinsic aerobic capacities (either workload or  $VO_{2\text{peak}}$ ), as assessed in the first incremental test. Regarding the workload (Fig 8A), each group ( $n = 21$ ) was subdivided into groups containing 7 rats with higher initial workloads and 7 rats with lower initial workloads; the 7 rats with intermediate workloads were excluded from this analysis. As expected, the trained rats, irrespective of the lower or higher initial workloads, exhibited greater improvements than the CON rats (Fig 8A). In addition, irrespective of the group (i.e., CON, DUR, INT or ID), the rats with higher initial workloads exhibited smaller improvements than the rats with lower initial workloads.

Regarding the  $VO_{2\text{peak}}$  (Fig 8B), each group was subdivided into groups containing 4 rats with a higher initial  $VO_{2\text{peak}}$  and 4 rats with a lower initial  $VO_{2\text{peak}}$ ; in the CON group ( $n = 9$ ), the rat with the intermediate  $VO_{2\text{peak}}$  was excluded from this analysis. No intergroup differences were identified in the  $VO_{2\text{peak}}$  changes between the third and first tests. In contrast, an intrinsic capacity-associated effect was identified. In the four experimental groups, the rats with a lower initial  $VO_{2\text{peak}}$  exhibited positive changes in this measure across the 8 weeks, whereas the rats with a higher initial  $VO_{2\text{peak}}$  exhibited negative changes (Fig 8B).

## Discussion

The current findings show that the three aerobic training protocols improved the physical performance of the rats subjected to incremental exercises (Fig 4). Nevertheless, the performance

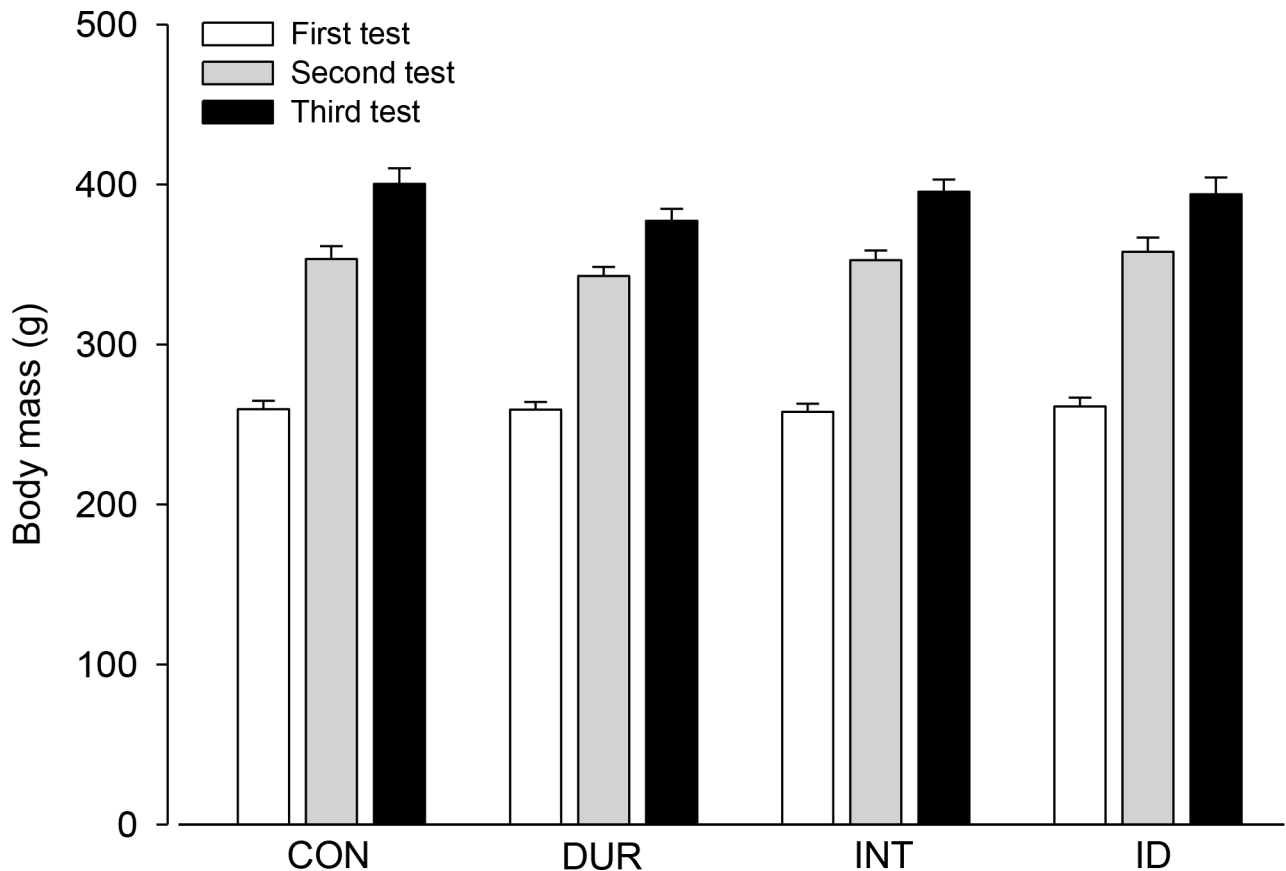

**Fig 3. Body mass of the rats.** Body mass was measured at three different time points: incremental exercises (tests) performed prior to the training (or control) protocols and at the end of the 4<sup>th</sup> and 8<sup>th</sup> weeks. Two-way ANOVA yielded the following results: group effect ( $F = 0.754$ ,  $p = 0.523$ ), moment effect ( $F = 833.941$ ,  $p < 0.001$ ) and interaction between the two factors ( $F = 1.299$ ,  $p = 0.261$ ). This analysis indicated that, irrespective of the group, body mass was higher in the second than in the first test and higher in the third than in the second and first tests.

<https://doi.org/10.1371/journal.pone.0183763.g003>

gain reached a plateau earlier in the group with a predominant overload in duration than in the other training groups. Thus, at the end of training, the performance gain identified in the DUR group was lower than that in the groups with a marked overload in intensity (i.e., the INT and ID groups; Fig 4A and 4B). This finding confirmed our hypothesis that a predominant overload in the intensity of aerobic training sessions would produce a greater improvement in physical performance. Furthermore, none of the training protocols changed the  $VO_{2peak}$  values; however, these values were attained at faster speeds, which indicated increased running economy. The lack of improvement in  $VO_{2peak}$  and of different gains in running economy induced by the three training protocols refuted our hypotheses.

The selection of a specific  $\%VO_{2max}$  for training sessions and the maintenance of this intensity across a training protocol is a common procedure adopted in rat studies [13, 14, 25]. The maintenance of a specific  $\%VO_{2max}$  is reached by regulating the treadmill speed (most common) or inclination, which thus ensures the individualization of the training overload. Because our aim was to investigate the effect of predominant overload on the intensity or duration of sessions and because the total distance covered among the three groups was matched in every training session, we could not ensure overload individualization. However, the application of overload was evident in the three training groups, as evidenced by increases in running duration and speed (Fig 1A and 1B). Not only the absolute speed but also the speed relative to the

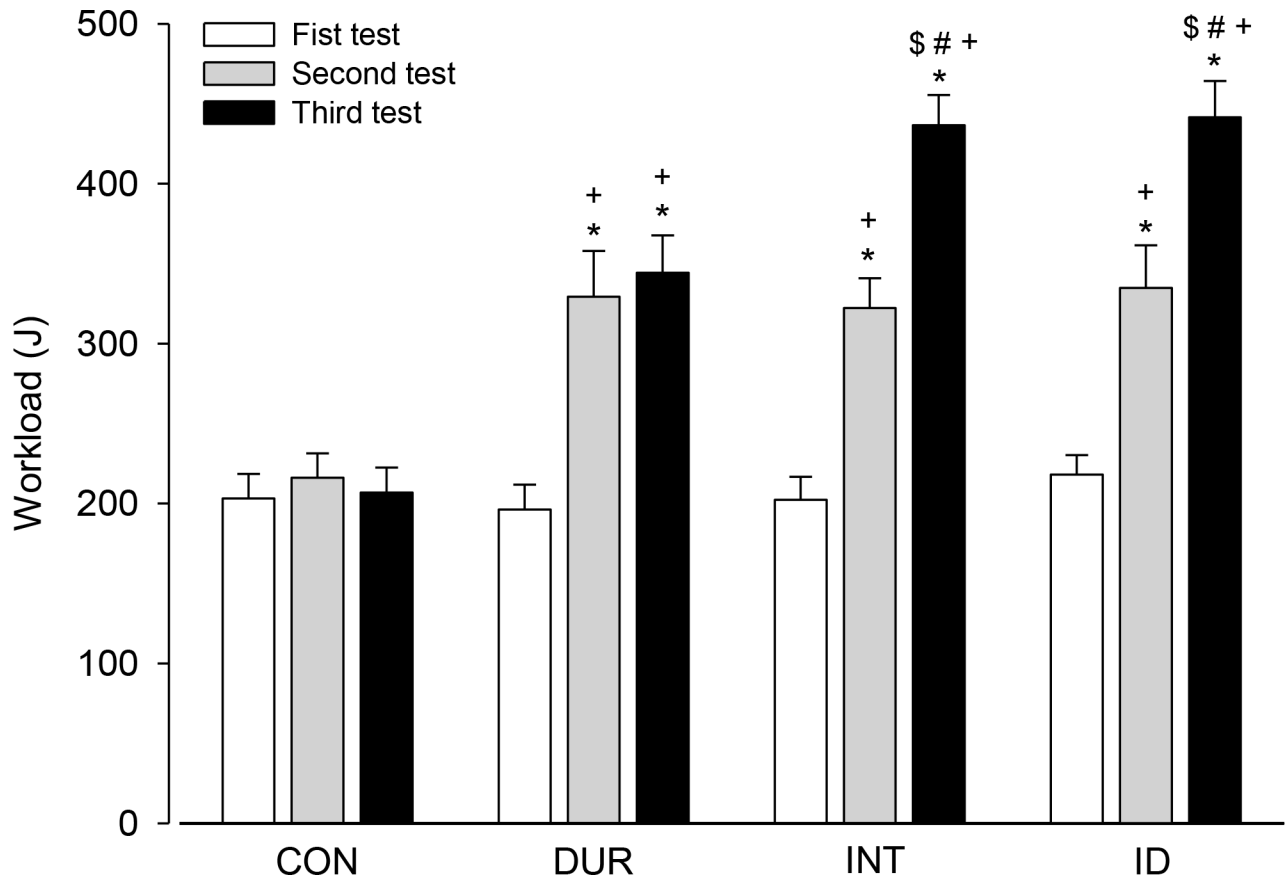

**Fig 4. Physical performance of the rats.** Physical performance was measured at three different time points: incremental exercises (tests) performed prior to the training (or control) protocols and at the end of the 4<sup>th</sup> and 8<sup>th</sup> weeks. Performance was evaluated by calculating the workload. Two-way ANOVA yielded the following results: group effect ( $F = 13.583, p < 0.001$ ), moment effect ( $F = 100.080, p < 0.001$ ) and interaction between the two factors ( $F = 12.906, p < 0.001$ ). \* Significantly different relative to the first test in the same group ( $p < 0.05$ ). + Significantly different relative to the CON group in the same test ( $p < 0.05$ ). # Significantly different relative to the second test in the same group ( $p < 0.05$ ). \$ Significantly different relative to the DUR group in the same test ( $p < 0.05$ ;  $n = 21$  rats per experimental group).

<https://doi.org/10.1371/journal.pone.0183763.g004>

$S_{max}$  was increased during the training protocols; in fact, the speed in the last training session corresponded to a higher % $S_{max}$  relative to the speed in the first session in the trained groups (Fig 2A). As expected, the overload in intensity was higher, intermediate and lower in the INT, ID and DUR groups, respectively. In contrast, the overload in duration was higher, intermediate and lower in the DUR, ID and INT groups, respectively.

To minimize the effect of body mass gain on physical performance, the total workload performed by the rats during the incremental exercises was calculated. The workload was similar for the CON group over the 8 weeks (Fig 4); these data indicate that 40 sessions with a 2-min duration do not provide physiological stimuli that generate the adaptations responsible for improved performance. In contrast, the trained groups exhibited training-mediated increases in workload. Interestingly, the DUR group reached a plateau in workload from the 4<sup>th</sup> week of training, and the INT and ID rats exhibited higher workloads than the DUR group at the end of training. These intergroup differences in the kinetics of performance gains can be explained by differences in the intensity of training sessions.

In the last session, the DUR group ran at an intensity that corresponded to 58% of the  $VO_{2peak}$  (Fig 2B), which represents moderate-intensity exercise according to guidelines for prescribing exercise for humans [26]. In addition, the DUR rats completed the training

protocol running at 43% of  $S_{\max}$ , an intensity that is below the lactate threshold for untrained rats, which has been reported at different intensities, including running at approximately 50% [27], 57% [28] or 75% of  $S_{\max}$  [29]. Thus, this moderate exercise performed by the DUR rats likely limited additional performance gains as the training protocol continued, despite the marked increases in the sessions' duration and training volume (Fig 1B). Because the INT and ID rats completed the last training session running at intensities that corresponded to 89% and 75% of the  $VO_{2\text{peak}}$  (Fig 4B), respectively, it is possible that higher intensities (which are classified as vigorous strain [26]) are required to induce the profound adaptations that underlie sustained improvements in performance. Notably, the speed at which the INT and ID rats ran during the last training session was above the lactate threshold for untrained rats, according to more conservative estimates [27, 28]. Interestingly, the ID group exhibited a performance similar to the INT group (Fig 4), suggesting that within the time frame investigated, effective aerobic training requires an overload in intensity; however, it does not need to be exclusive and may be associated with an overload in duration in an alternating manner.

The initial fitness level may modulate training responses in humans [2, 30]. Indeed, a study conducted with 633 individuals subjected to a 20-week training program showed that baseline  $VO_{2\text{max}}$  values correlated significantly, but weakly ( $r = -0.37$ ;  $p < 0.001$ ), with training-induced percent changes in the  $VO_{2\text{max}}$  [31]. In the present study, the rats with lower intrinsic endurance exhibited increased performance gains (workload improvement) after being subjected to the three training protocols (Fig 8A). Along the same lines, the rats with lower intrinsic  $VO_{2\text{peak}}$  values exhibited positive changes in this physiological parameter following aerobic training, whereas the rats with higher  $VO_{2\text{peak}}$  values exhibited negative changes. Interestingly, the predominant overload in the intensity or duration of sessions did not differentially modulate the changes in workload or  $VO_{2\text{peak}}$  in the rats with lower and higher initial levels of fitness (Fig 8A and 8B). These findings indicate that among the currently assessed training protocols, no particularly effective protocol for developing aerobic capacity in rats with different intrinsic capacities was identified.

The current training protocols failed to improve the  $VO_{2\text{peak}}$  in rats (Fig 5), which disagrees with previous findings [13, 25]. These contradictory reports may be explained by the different exercise intensities employed during the training sessions. Whereas Wisloff et al. [25] and Kemi et al. [13] subjected rats to high- (85–90% of  $VO_{2\text{max}}$ ) or moderate-intensity (65–70% of  $VO_{2\text{max}}$ ) interval trainings, it is likely that our rats achieved these moderate-to-high intensities only during the last weeks of training. Another reasonable explanation for the absence of improvement in the  $VO_{2\text{peak}}$  after training is the expected age-related reduction in this physiological parameter. Because our rats initiated the familiarization protocol at 12 weeks of age, they concluded training at 21 weeks of age, which represents an age at which a decrease in  $VO_{2\text{max}}$  is expected, according to Pica and Brooks [32]. These authors showed that the absolute and relative  $VO_{2\text{max}}$  increased in untrained and trained female rats until 20 weeks of age. The adult untrained rats subsequently exhibited a reduction in  $VO_{2\text{max}}$ , whereas the trained rats maintained the level of this physiological parameter, although a statistical trend toward a  $VO_{2\text{max}}$  reduction was identified. However, the latter explanation may not be the best; Wisloff et al. [25] and Kemi et al. [13] initiated their protocols using rats of the same age and body mass as those used in the present study.

Another possible explanation for the lack of improvement in  $VO_{2\text{peak}}$  after training is the exercise protocol used for  $VO_2$  testing. We conducted prolonged incremental-speed running because long-lasting efforts were associated with greater  $VO_{2\text{max}}$  [15], a finding that was reproduced in the present study. Nevertheless, Wisloff et al. [25] showed that the treadmill inclination significantly affected the highest oxygen uptake measured, with  $VO_{2\text{peak}}$  values being greater at an inclination of 25° than at 0, 15, 20 or 30°. The use of 5° inclination in the present

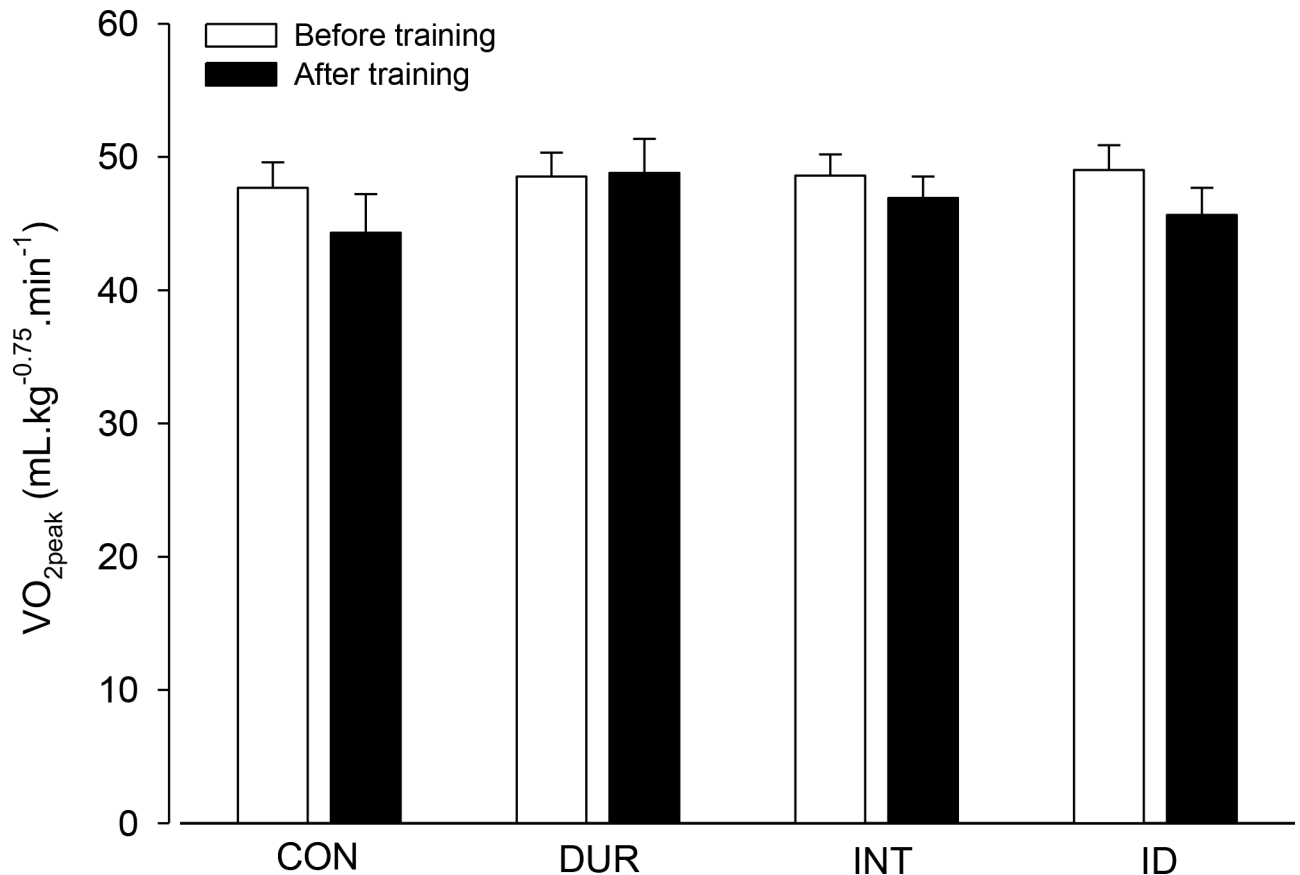

**Fig 5. Peak rate of oxygen consumption ( $VO_{2peak}$ ) of the rats.**  $VO_{2peak}$ , adjusted for the rat's size ( $kg^{-0.75}$ ), was measured at two different time points: incremental exercises performed before and after the training (or control) protocols. Two-way ANOVA yielded the following results: group effect ( $F = 0.696$ ,  $p = 0.562$ ), moment effect ( $F = 1.589$ ,  $p = 0.218$ ) and interaction between the two factors ( $F = 0.287$ ,  $p = 0.835$ ;  $n = 9$  rats for the CON group and  $n = 8$  rats for the other groups).

<https://doi.org/10.1371/journal.pone.0183763.g005>

study intended to standardize inclination during training sessions and tests for determining performance but may have hindered observations of training-induced adaptations if the true  $VO_{2max}$  was not reached by the rats [25].

In humans,  $VO_{2max}$  (or  $VO_{2peak}$ ) is not the only physiological parameter that modulates aerobic performance [9]. In agreement with this finding, a dissociation between improvements in performance and  $VO_{2max}$  has also been observed in rats; enhanced performance (time to exhaustion) was exhibited at the 4<sup>th</sup> week after training was initiated, whereas the  $VO_{2max}$  was increased only at the 12<sup>th</sup> week [33]. In the present study, the training-induced adaptations enabled the rats to attain increased treadmill speeds, despite the finding that their  $VO_{2peak}$  values were similar to those recorded prior to the training protocol (Fig 6). The latter result suggests that the three training protocols improved the running economy of the rats, which, in fact, did occur (Fig 7). Interestingly, Wisloff et al. [25] suggested that training at lower intensities may substantially improve running (work) economy without altering the  $VO_{2max}$ ; moreover, increased economy may imply increased work capacity and could therefore be a more relevant measure to assess the effect of specific training regimens, which appeared to be the case in the present study.

The observed changes in running economy may be explained by biomechanical factors, including improved technique and the transfer of elastic energy during stretch-shortening

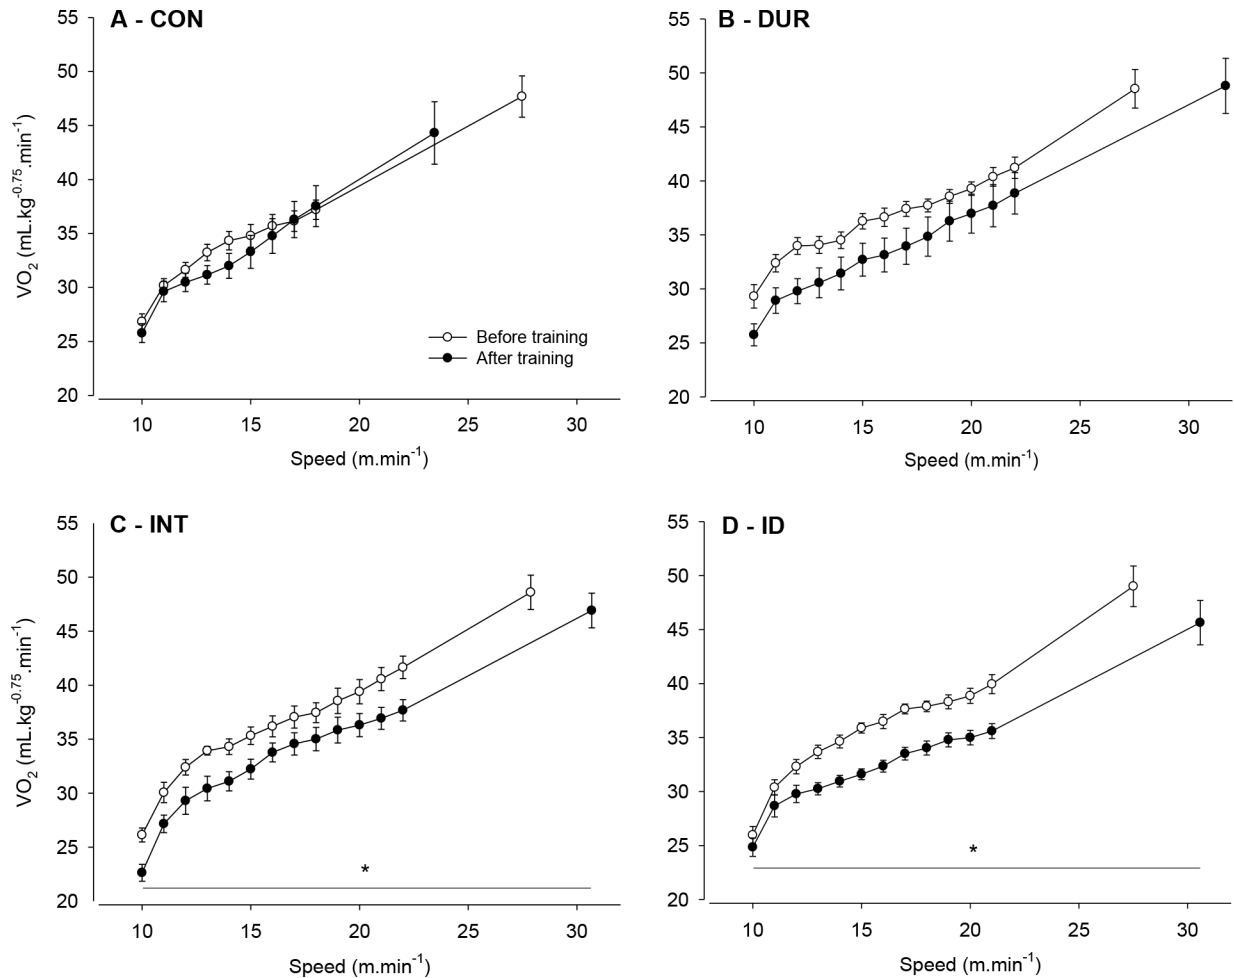

**Fig 6.  $VO_2$  ( $mL.kg^{-0.75}.min^{-1}$ ) of the rats during the incremental exercises.** Incremental exercises were performed at two different time points: before and after the training or control protocols in the CON (panel A), DUR (panel B), INT (panel C) and ID (panel D) groups. Two-way ANOVA yielded the following results: moment effect (A:  $F = 0.720, p = 0.409$ ; B:  $F = 3.697, p = 0.075$ ; C:  $F = 7.343, p = 0.017$ ; D:  $F = 23.762, p < 0.001$ ), running speed effect (A:  $F = 85.726, p < 0.001$ ; B:  $F = 69.683, p < 0.001$ ; C:  $F = 128.777, p < 0.001$ ; D:  $F = 104.292, p < 0.001$ ) and interaction between the two factors (A:  $F = 0.806, p = 0.611$ ; B:  $F = 0.782, p = 0.678$ ; C:  $F = 0.378, p = 0.975$ ; D:  $F = 0.994, p = 0.457$ ). \* Significant major effect of moment ( $p < 0.05$ ). Differences in  $VO_2$  caused by running speeds within the experimental groups are not displayed in the figure to avoid an excess description of obvious information;  $n = 9$  rats for the CON group and  $n = 8$  rats for the other groups.

<https://doi.org/10.1371/journal.pone.0183763.g006>

cycles [34], as well as by physiological adaptations in skeletal muscle, including an increase in mitochondrial content, which results in increased respiratory capacity [35, 36]. Whereas these biomechanical factors have never been studied in rats, aerobic training induces several skeletal muscle adaptations in this species [37, 38]. A consequence of these mitochondrial adaptations is the increased utilization of fat during submaximal exercise, with a proportional decrease in carbohydrate utilization [39]. Collectively, these adaptations may contribute to increased endurance and a raised lactate threshold in the trained state, i.e., to exercise at a higher %  $VO_{2max}$  [39]. Muscular adaptations in response to aerobic training have also been associated with  $VO_{2max}$  improvements [40].

The greater gains in performance exhibited by the INT and ID groups compared with those of the DUR group cannot be explained by different changes in the  $VO_{2peak}$  (Fig 5) or running economy (Fig 7). Aside from the  $VO_{2max}$  and running economy, the ergogenic effects of

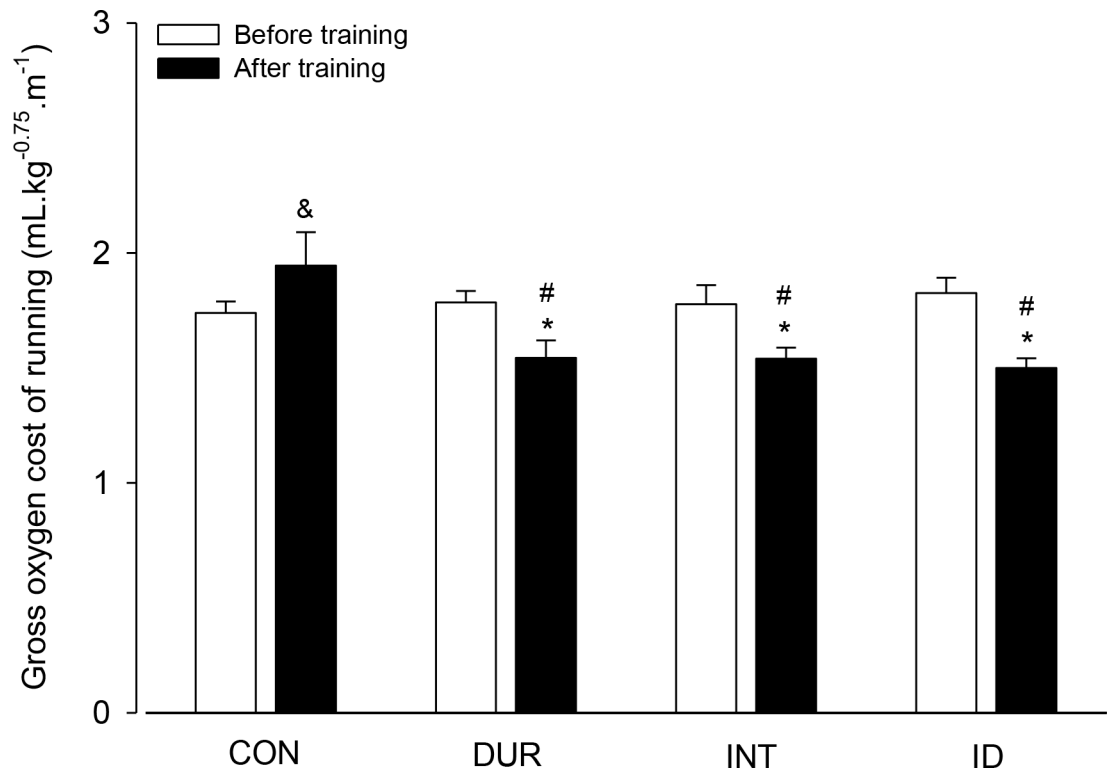

**Fig 7. Gross oxygen cost of running (mL.kg<sup>-0.75</sup>.m<sup>-1</sup>) of the rats.** The gross oxygen cost of running was calculated at the last completed stage during incremental exercises performed before and after the training (or control) protocols. Two-way ANOVA yielded the following results: group effect ( $F = 2.424$ ,  $p = 0.086$ ), moment effect ( $F = 7.968$ ,  $p = 0.009$ ) and interaction between the two factors ( $F = 5.450$ ,  $p = 0.004$ ). \* Significantly different relative to the measurement obtained prior to the training protocols ( $p < 0.05$ ). # Significantly different relative to the CON group in the same test ( $p < 0.01$ ). & Trend toward a significant difference relative to the measurement obtained prior to the control protocol ( $p = 0.051$ ;  $n = 9$  rats for the CON group and  $n = 8$  rats for the other groups).

<https://doi.org/10.1371/journal.pone.0183763.g007>

aerobic training may be explained by changes in the lactate threshold [41]. Therefore, the different gains in performance between our trained groups are likely explained by differences in the speed at which the lactate threshold was reached. A recent comparison between two training protocols (longer-duration and low-intensity vs. high-intensity interval training) showed that the lactate threshold was reached at a higher power output in trained rowers subjected to high-intensity training [42]. Similar evidence has not been provided for laboratory rats; de Araujo et al. [43] compared the effects of two training protocols (continuous vs. interval) on rats' lactate threshold, but neither protocol was effective at increasing the running speed associated with the lactate threshold.

In conclusion, the three studied aerobic training protocols improved the physical performance of rats subjected to incremental-speed treadmill running. The group with a predominant overload in duration exhibited a plateau in performance during the last 4 weeks of the study, whereas the groups with an overload in intensity did not exhibit this plateau. This observation resulted in an increased performance of the INT and ID groups compared with that in the DUR group at the end of the training protocol. In addition, the evaluated training protocols did not induce changes in  $VO_{2peak}$ , despite the observation that this physiological parameter was reached at higher speeds, indicating increased running economy after training. Finally, rats with lower intrinsic endurance displayed greater improvements in performance induced by the three evaluated trainings than rats with higher intrinsic endurance.

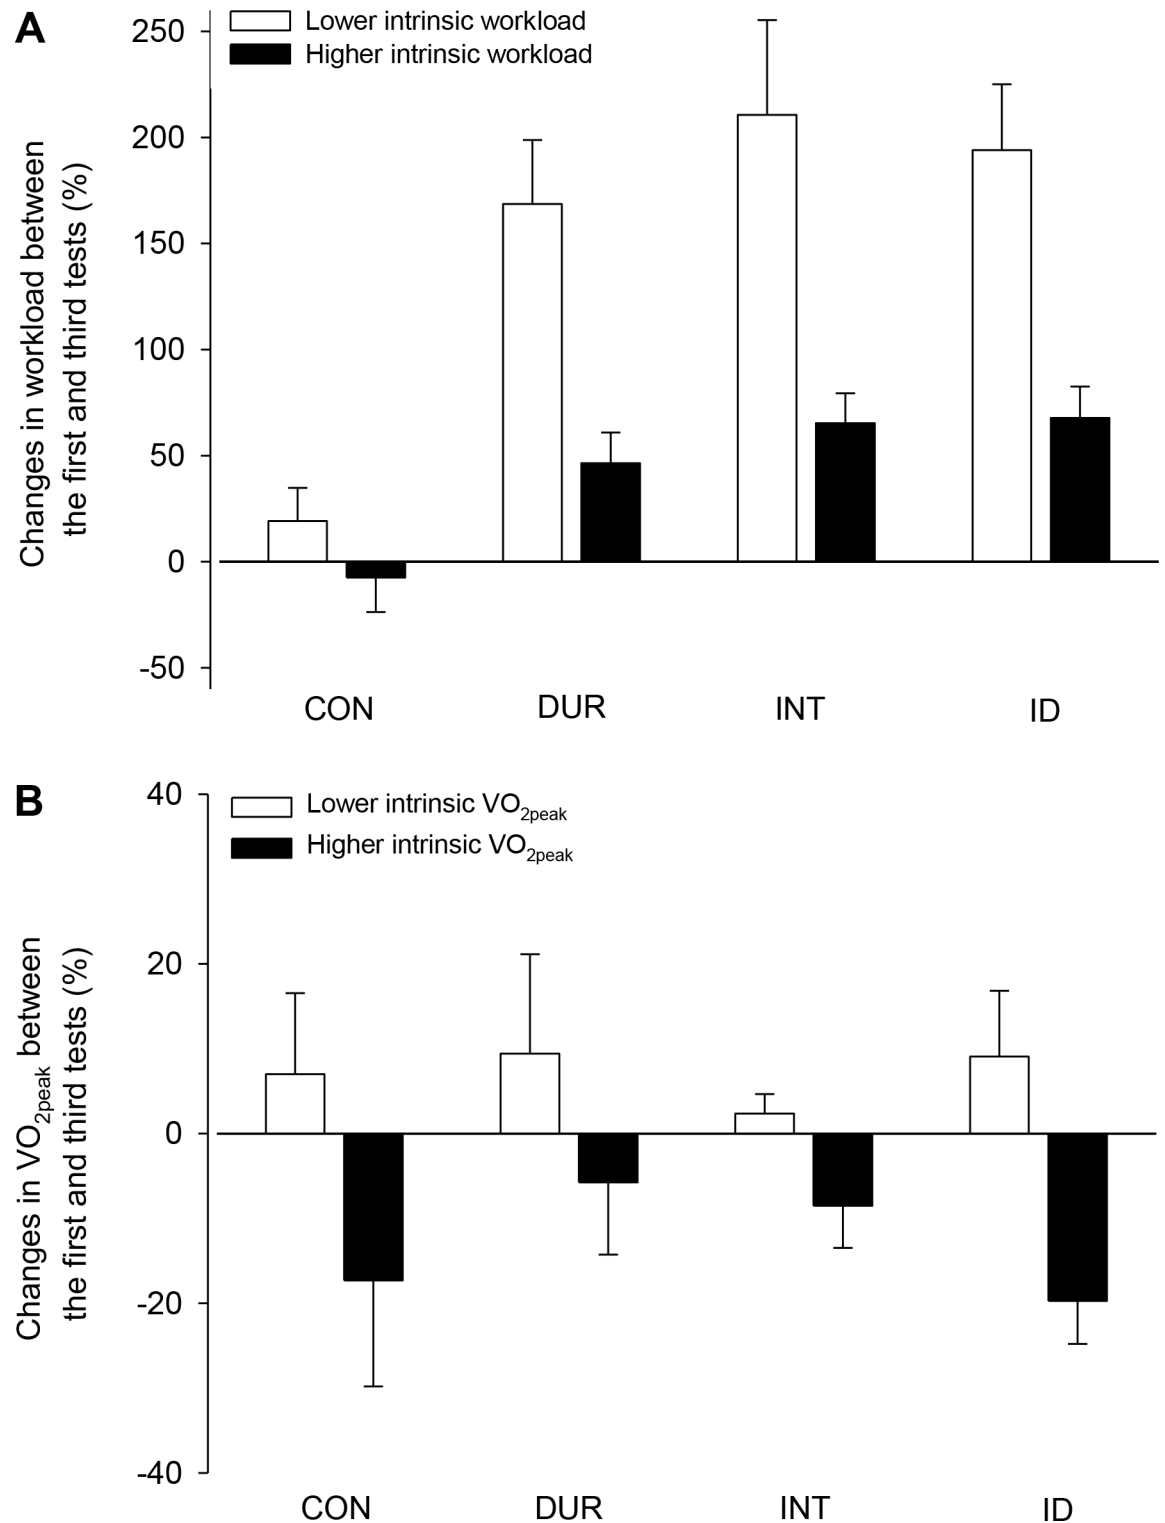

**Fig 8. Changes in performance between the first and third tests in the four experimental groups.** Each group was subdivided into rats with lower and higher intrinsic aerobic capacities, as determined by a performance evaluation in the first incremental exercise. Two-way ANOVA of the data presented in panel A (workload) yielded the following results: group effect ( $F = 11.980, p < 0.001$ ), aerobic capacity effect ( $F = 35.297, p < 0.001$ ) and interaction between the two factors ( $F = 2.268, p = 0.092$ ). Two-way ANOVA of the data presented in panel B ( $VO_{2peak}$ ) yielded the following results: group effect ( $F = 0.311, p = 0.817$ ), aerobic capacity effect ( $F = 10.936, p = 0.003$ ) and interaction between the two factors ( $F = 0.473, p = 0.704$ ;  $n = 9$ )



rats for the control group and  $n = 8$  rats per training group, with 4 rats with a higher initial  $VO_{2peak}$  and 4 rats with a lower initial  $VO_{2peak}$  being used in this analysis).

<https://doi.org/10.1371/journal.pone.0183763.g008>

## Supporting information

**S1 Table. Sessions of aerobic training with predominant overload in duration.**  
(DOCX)

**S2 Table. Sessions of aerobic training with predominant overload in intensity.**  
(DOCX)

**S3 Table. Sessions of aerobic training with alternating and similar overloads in intensity and duration.**  
(DOCX)

## Author Contributions

**Conceptualization:** Francisco Teixeira-Coelho, Letícia Maria de Souza Cordeiro, Cândido Celso Coimbra, Washington Pires, Danusa Dias Soares, Samuel Penna Wanner.

**Formal analysis:** Francisco Teixeira-Coelho, Cletiana Gonçalves Fonseca, Samuel Penna Wanner.

**Funding acquisition:** Cândido Celso Coimbra, Danusa Dias Soares, Samuel Penna Wanner.

**Investigation:** Francisco Teixeira-Coelho, Cletiana Gonçalves Fonseca, Nicolas Henrique Santos Barbosa, Filipe Ferreira Vaz, Washington Pires, Samuel Penna Wanner.

**Methodology:** Francisco Teixeira-Coelho, Samuel Penna Wanner.

**Project administration:** Francisco Teixeira-Coelho, Samuel Penna Wanner.

**Resources:** Cândido Celso Coimbra, Danusa Dias Soares, Samuel Penna Wanner.

**Supervision:** Samuel Penna Wanner.

**Visualization:** Francisco Teixeira-Coelho, Samuel Penna Wanner.

**Writing – original draft:** Francisco Teixeira-Coelho, Samuel Penna Wanner.

**Writing – review & editing:** Francisco Teixeira-Coelho, Cletiana Gonçalves Fonseca, Nicolas Henrique Santos Barbosa, Filipe Ferreira Vaz, Letícia Maria de Souza Cordeiro, Cândido Celso Coimbra, Washington Pires, Danusa Dias Soares, Samuel Penna Wanner.

## References

1. Meeusen R, Duclos M, Foster C, Fry A, Gleeson M, Nieman D, et al. Prevention, diagnosis, and treatment of the overtraining syndrome: Joint consensus statement of the European College of Sport Science and the American College of Sports Medicine. *Med Sci Sports Exerc.* 2013; 45: 186–205. <https://doi.org/10.1249/MSS.0b013e318279a10a> PMID: 23247672
2. Wenger HA, Bell GJ. The interactions of intensity, frequency and duration of exercise training in altering cardiorespiratory fitness. *Sports Med.* 1986; 3: 346–356. PMID: 3529283
3. Laursen PB. Training for intense exercise performance: High-intensity or high-volume training? *Scand J Med Sci Sports.* 2010; 20 Suppl 2: 1–10.
4. Costill DL, Thomas R, Robergs RA, Pascoe D, Lambert C, Barr S, et al. Adaptations to swimming training: Influence of training volume. *Med Sci Sports Exerc.* 1991; 23: 371–377.
5. Fiskerstrand A, Seiler KS. Training and performance characteristics among Norwegian international rowers 1970–2001. *Scand J Med Sci Sports.* 2004; 14: 303–310. <https://doi.org/10.1046/j.1600-0838.2003.370.x> PMID: 15387804

6. Ingham SA, Carter H, Whyte GP, Doust JH. Physiological and performance effects of low- versus mixed-intensity rowing training. *Med Sci Sports Exerc.* 2008; 40: 579–584. <https://doi.org/10.1249/MSS.0b013e31815ecc6a> PMID: 18379224
7. Helgerud J, Hoydal K, Wang E, Karlsen T, Berg P, Bjerkaas M, et al. Aerobic high-intensity intervals improve VO<sub>2</sub>max more than moderate training. *Med Sci Sports Exerc.* 2007; 39: 665–671. <https://doi.org/10.1249/mss.0b013e3180304570> PMID: 17414804
8. Weston KS, Wisloff U, Coombes JS. High-intensity interval training in patients with lifestyle-induced cardiometabolic disease: A systematic review and meta-analysis. *Br J Sports Med.* 2014; 48: 1227–1234. <https://doi.org/10.1136/bjsports-2013-092576> PMID: 24144531
9. Joyner MJ, Coyle EF. Endurance exercise performance: The physiology of champions. *J Physiol.* 2008; 586: 35–44. <https://doi.org/10.1113/jphysiol.2007.143834> PMID: 17901124
10. McLaughlin JE, Howley ET, Bassett DR Jr., Thompson DL, Fitzhugh EC. Test of the classic model for predicting endurance running performance. *Med Sci Sports Exerc.* 2010; 42: 991–997. <https://doi.org/10.1249/MSS.0b013e3181c0669d> PMID: 19997010
11. Conley DL, Krahenbuhl GS. Running economy and distance running performance of highly trained athletes. *Med Sci Sports Exerc.* 1980; 12: 357–360. PMID: 7453514
12. Franch J, Madsen K, Djurhuus MS, Pedersen PK. Improved running economy following intensified training correlates with reduced ventilatory demands. *Med Sci Sports Exerc.* 1998; 30: 1250–1256. PMID: 9710865
13. Kemi OJ, Haram PM, Loennechen JP, Osnes JB, Skomedal T, Wisloff U, et al. Moderate vs. high exercise intensity: Differential effects on aerobic fitness, cardiomyocyte contractility, and endothelial function. *Cardiovasc Res.* 2005; 67: 161–172. <https://doi.org/10.1016/j.cardiores.2005.03.010> PMID: 15949480
14. Moreira JB, Bechara LR, Bozi LH, Jannig PR, Monteiro AW, Dourado PM, et al. High- versus moderate-intensity aerobic exercise training effects on skeletal muscle of infarcted rats. *J Appl Physiol* (1985). 2013; 114: 1029–1041.
15. Primola-Gomes TN, Campos LA, Lauton-Santos S, Balthazar CH, Guatimosim S, Capettini LS, et al. Exercise capacity is related to calcium transients in ventricular cardiomyocytes. *J Appl Physiol* (1985). 2009; 107: 593–598.
16. Rabelo PC, Almeida TF, Guimaraes JB, Barcellos LA, Cordeiro LM, Moraes MM, et al. Intrinsic exercise capacity is related to differential monoaminergic activity in the rat forebrain. *Brain Res Bull.* 2015; 112: 7–13. <https://doi.org/10.1016/j.brainresbull.2015.01.006> PMID: 25617713
17. Londeree BR. Effect of training on lactate/ventilatory thresholds: A meta-analysis. *Med Sci Sports Exerc.* 1997; 29: 837–843. PMID: 9219214
18. Santiago HP, Leite LH, Lima PM, Rodovalho GV, Szawka RE, Coimbra CC. The improvement of exercise performance by physical training is related to increased hypothalamic neuronal activation. *Clin Exp Pharmacol Physiol.* 2016; 43: 116–124. <https://doi.org/10.1111/1440-1681.12507> PMID: 26475529
19. Wanner SP, Guimaraes JB, Rodrigues LO, Marubayashi U, Coimbra CC, Lima NR. Muscarinic cholinergic receptors in the ventromedial hypothalamic nucleus facilitate tail heat loss during physical exercise. *Brain Res Bull.* 2007; 73: 28–33. <https://doi.org/10.1016/j.brainresbull.2007.03.004> PMID: 17499633
20. Damasceno WC, Pires W, Lima MR, Lima NR, Wanner SP. The dynamics of physical exercise-induced increases in thalamic and abdominal temperatures are modified by central cholinergic stimulation. *Neurosci Lett.* 2015; 590: 193–198. <https://doi.org/10.1016/j.neulet.2015.01.082> PMID: 25655022
21. Taylor CR, Maloiy GM, Weibel ER, Langman VA, Kamau JM, Seeherman HJ, et al. Design of the mammalian respiratory system. III Scaling maximum aerobic capacity to body mass: Wild and domestic mammals. *Respir Physiol.* 1981; 44: 25–37. PMID: 7232885
22. Kunstetter AC, Wanner SP, Madeira LG, Wilke CF, Rodrigues LO, Lima NR. Association between the increase in brain temperature and physical performance at different exercise intensities and protocols in a temperate environment. *Braz J Med Biol Res.* 2014; 47: 679–688. <https://doi.org/10.1590/1414-431X20143561> PMID: 25003543
23. Drummond LR, Kunstetter AC, Vaz FF, Campos HO, Andrade AG, Coimbra CC, et al. Brain temperature in spontaneously hypertensive rats during physical exercise in temperate and warm environments. *PLoS One.* 2016; 11: e0155919. <https://doi.org/10.1371/journal.pone.0155919> PMID: 27214497
24. Helgerud J. Maximal oxygen uptake, anaerobic threshold and running economy in women and men with similar performances level in marathons. *Eur J Appl Physiol Occup Physiol.* 1994; 68: 155–161. PMID: 8194545
25. Wisloff U, Helgerud J, Kemi OJ, Ellingsen O. Intensity-controlled treadmill running in rats: VO<sub>2</sub> max and cardiac hypertrophy. *Am J Physiol Heart Circ Physiol.* 2001; 280: H1301–H1310. PMID: 11179077

26. Garber CE, Blissmer B, Deschenes MR, Franklin BA, Lamonte MJ, Lee IM, et al. American College of Sports Medicine position stand. Quantity and quality of exercise for developing and maintaining cardiorespiratory, musculoskeletal, and neuromotor fitness in apparently healthy adults: Guidance for prescribing exercise. *Med Sci Sports Exerc.* 2011; 43: 1334–1359. <https://doi.org/10.1249/MSS.0b013e318213fefb> PMID: 21694556
27. Pilis W, Zarzeczny R, Langfort J, Kaciuba-Uscilko H, Nazar K, Wojtyna J. Anaerobic threshold in rats. *Comp Biochem Physiol Comp Physiol.* 1993; 106: 285–289. PMID: 7902799
28. Soya H, Mukai A, Deocarís CC, Ohiwa N, Chang H, Nishijima T, et al. Threshold-like pattern of neuronal activation in the hypothalamus during treadmill running: Establishment of a minimum running stress (MRS) rat model. *Neurosci Res.* 2007; 58: 341–348. <https://doi.org/10.1016/j.neures.2007.04.004> PMID: 17524508
29. Carvalho JF, Masuda MO, Pompeu FA. Method for diagnosis and control of aerobic training in rats based on lactate threshold. *Comp Biochem Physiol A Mol Integr Physiol.* 2005; 140: 409–413. <https://doi.org/10.1016/j.cbpb.2004.12.002> PMID: 15936699
30. Saltin B, Hartley LH, Kilbom A, Astrand I. Physical training in sedentary middle-aged and older men. II. Oxygen uptake, heart rate, and blood lactate concentration at submaximal and maximal exercise. *Scand J Clin Lab Invest.* 1969; 24: 323–334. PMID: 5383327
31. Skinner JS, Jaskolski A, Jaskolska A, Krasnoff J, Gagnon J, Leon AS, et al. Age, sex, race, initial fitness, and response to training: The HERITAGE Family Study. *J Appl Physiol (1985).* 2001; 90: 1770–1776.
32. Pica AJ, Brooks GA. Effects of training and age on VO<sub>2</sub>max in laboratory rats. *Med Sci Sports Exerc.* 1982; 14: 249–252. PMID: 7109895
33. Lambert MI, Noakes TD. Dissociation of changes in VO<sub>2</sub> max, muscle QO<sub>2</sub>, and performance with training in rats. *J Appl Physiol (1985).* 1989; 66: 1620–1625.
34. Saunders PU, Pyne DB, Telford RD, Hawley JA. Factors affecting running economy in trained distance runners. *Sports Med.* 2004; 34: 465–485. PMID: 15233599
35. Baar K. Involvement of PPAR gamma co-activator-1, nuclear respiratory factors 1 and 2, and PPAR alpha in the adaptive response to endurance exercise. *Proc Nutr Soc.* 2004; 63: 269–273. <https://doi.org/10.1079/PNS2004334> PMID: 15294042
36. Holloszy JO. Regulation by exercise of skeletal muscle content of mitochondria and GLUT4. *J Physiol Pharmacol.* 2008; 59 Suppl 7: 5–18.
37. Marton O, Koltai E, Takeda M, Koch LG, Britton SL, Davies KJ, et al. Mitochondrial biogenesis-associated factors underlie the magnitude of response to aerobic endurance training in rats. *Pflugers Arch.* 2015; 467: 779–788. <https://doi.org/10.1007/s00424-014-1554-7> PMID: 24943897
38. Zoladz JA, Koziel A, Woyda-Ploszczyca A, Celichowski J, Jarmuszkiwicz W. Endurance training increases the efficiency of rat skeletal muscle mitochondria. *Pflugers Arch.* 2016; 468: 1709–1724. <https://doi.org/10.1007/s00424-016-1867-9> PMID: 27568192
39. Holloszy JO, Coyle EF. Adaptations of skeletal muscle to endurance exercise and their metabolic consequences. *J Appl Physiol Respir Environ Exerc Physiol.* 1984; 56: 831–838. PMID: 6373687
40. Daussin FN, Zoll J, Dufour SP, Ponsot E, Lonsdorfer-Wolf E, Doutreleau S, et al. Effect of interval versus continuous training on cardiorespiratory and mitochondrial functions: Relationship to aerobic performance improvements in sedentary subjects. *Am J Physiol Regul Integr Comp Physiol.* 2008; 295: R264–R272. <https://doi.org/10.1152/ajpregu.00875.2007> PMID: 18417645
41. Pate RR, Kriska A. Physiological basis of the sex difference in cardiorespiratory endurance. *Sports Med.* 1984; 1: 87–98. PMID: 6567230
42. Ni Cheilleachair NJ, Harrison AJ, Warrington GD. HIIT enhances endurance performance and aerobic characteristics more than high-volume training in trained rowers. *J Sports Sci.* 2016; 35: 1052–1058. <https://doi.org/10.1080/02640414.2016.1209539> PMID: 27438378
43. de Araujo GG, Gobatto CA, Marcos-Pereira M, Dos Reis IG, Verlengia R. Interval versus continuous training with identical workload: Physiological and aerobic capacity adaptations. *Physiol Res.* 2015; 64: 209–219. PMID: 25317688
